# Supplementary material
Source: Springer Nature journal article supplement (https://www.springermedizin.de/resource/supplementary/12891_2013_1869_MOESM4_ESM.pdf/9508646)

**a**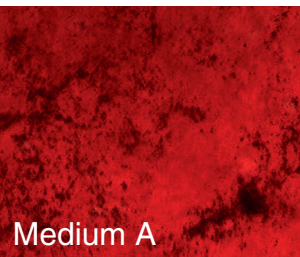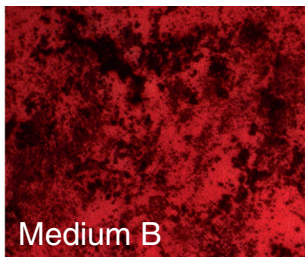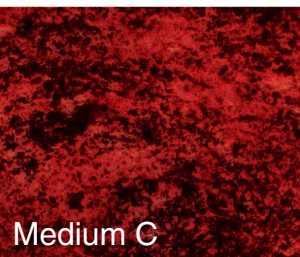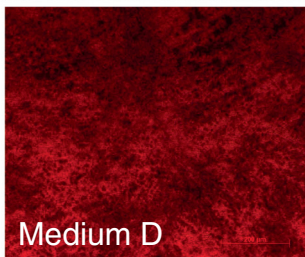**b**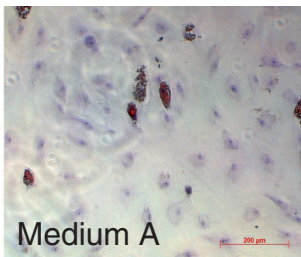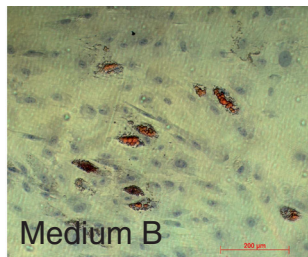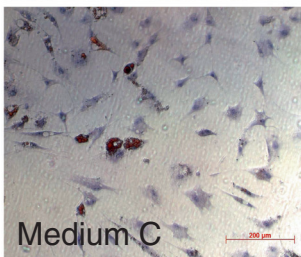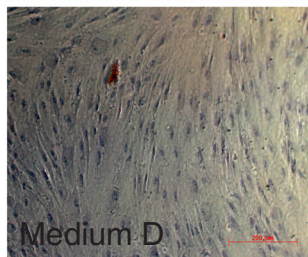**c**

Medium A

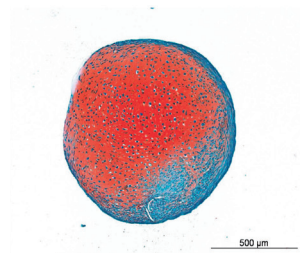

Medium B

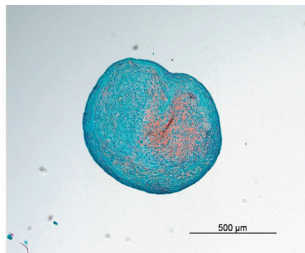

Medium C

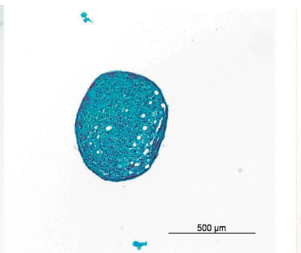

Medium D

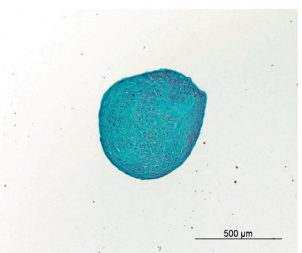

Supplement: MOESM4 [file 9508646]
